# Supplementary material
Source: publisher figshare collection journal article supplement (https://acs.figshare.com/ndownloader/files/9254584)
Supplement: Supplementary file 1 [file 9254584]

# **Bio-templated synthesis of TiO<sub>2</sub> coated gold nanowire for perovskite solar cells**

Ippei Inoue<sup>†\*</sup>, Yuki Umemura<sup>‡</sup>, Itaru Raifuku<sup>‡</sup>, Kenichi Toyoda<sup>‡</sup>, Yasuaki Ishikawa<sup>‡</sup>, Seigo Ito<sup>§</sup>, Hisashi Yasueda<sup>†</sup>, Yukiharu Uraoka<sup>‡</sup>, Ichiro Yamashita<sup>‡</sup>

<sup>†</sup> Frontier Research Labs., Institute for Innovation, Ajinomoto Co., Inc., 1-1, Suzuki-cho, Kawasaki-ku, Kawasaki-shi, Kanagawa 210-8681, Japan

<sup>‡</sup> Graduate School of Materials Science, Nara Institute of Science and Technology, 8916-5 Takayama, Ikoma, Nara, 630-0192, Japan

<sup>§</sup> Department of Materials and Synchrotron Radiation Engineering, Graduate School of Engineering, University of Hyogo. 2167 Shosha, Himeji, Hyogo, 671-2280 Japan

E-mail: ippei\_inoue@ajinomoto.com

## **Supporting Information**

### **Contents list**

|                                                                                 |     |
|---------------------------------------------------------------------------------|-----|
| TEM image of a mixture of GNW and Dps .....                                     | S-2 |
| Gold binding activity of TDG1 .....                                             | S-2 |
| Raman spectrums of a TiO <sub>2</sub> layers .....                              | S-3 |
| EDS mapping of the nanowire .....                                               | S-3 |
| TEM image of a GNW mixed with titanium precursor .....                          | S-4 |
| Stability of a TiO <sub>2</sub> coated Au-nanomaterial in iodide solution ..... | S-4 |
| Electrochemical impedance spectra of PSCs with the nanowire .....               | S-5 |

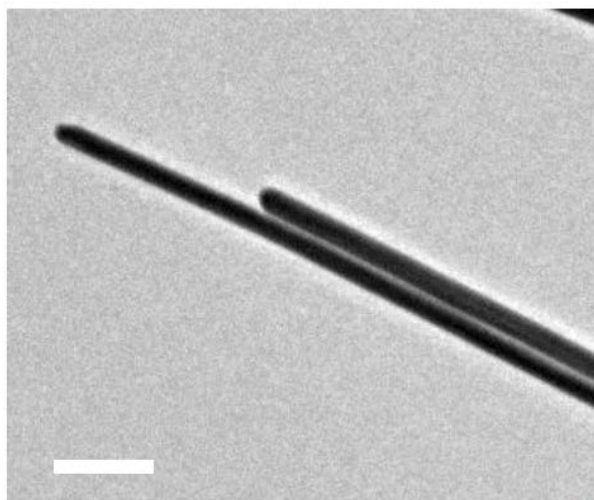

Figure S1. TEM image of a mixture of GNW and Dps. The sample was analyzed with 3% PTA stain. Dps could not bind the surface of GNW. The scale bar is 200 nm.

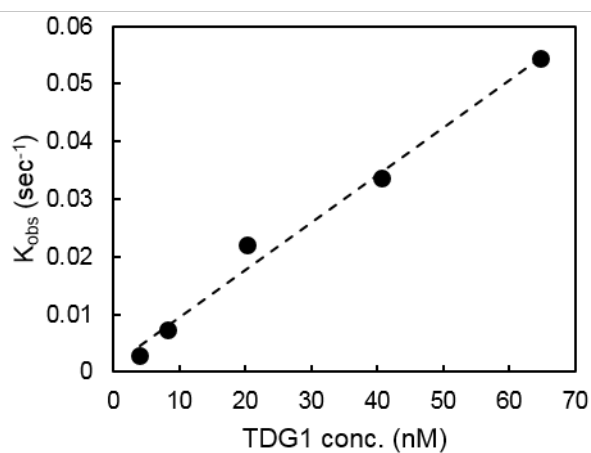

Figure S2. Gold binding activity of TDG1. The changes in resonance frequency of QCM were measured as a function of time after the addition of TDG1 to gold sensor. The graph shows the correlations between the concentrations of TDG1 and  $k_{obs}$ .

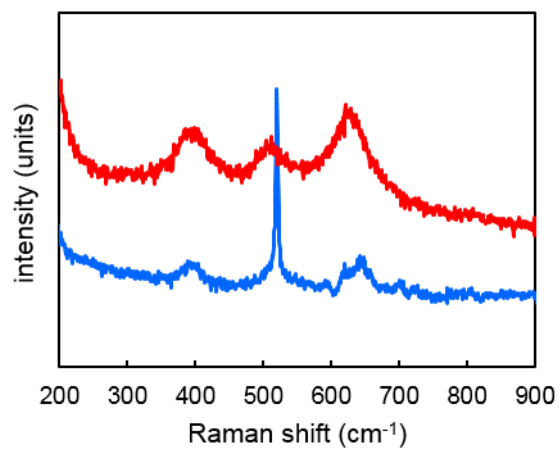

Figure S3. Raman spectrums of a  $\text{TiO}_2$  layers. The  $\text{TiO}_2$  layers deposited on Si-plate by minTBP1 were annealed at 100 °C (blue line) or 200 °C (red line). The peaks at 400  $\text{cm}^{-1}$ , 510  $\text{cm}^{-1}$  and 630  $\text{cm}^{-1}$  are attributed to anatase- $\text{TiO}_2$ . The sharp peak at 520  $\text{cm}^{-1}$  in blue line due to the Si-plate.

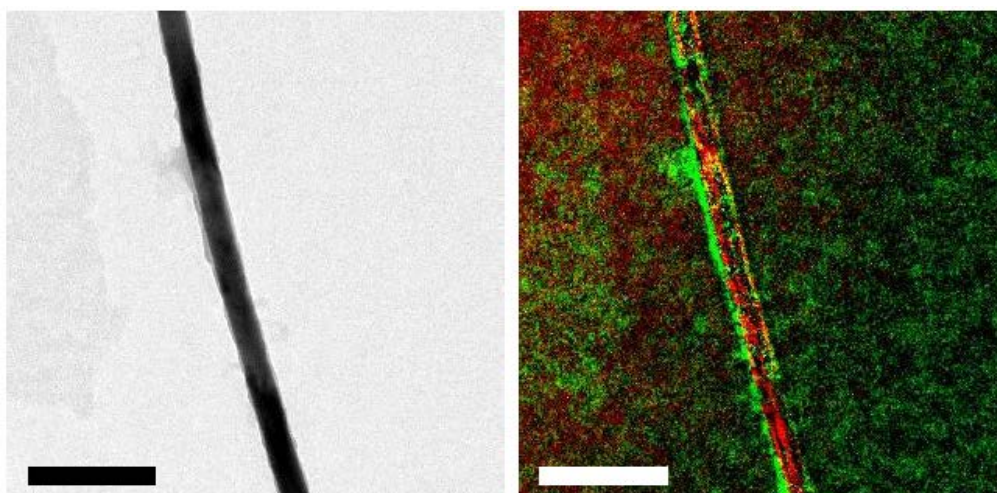

Figure S4. (a) TEM image and (b) EDS mapping of the nanowire. A layer containing titanium (green) was detected around the fibrous structure containing gold (red). The scale bars are 200 nm.

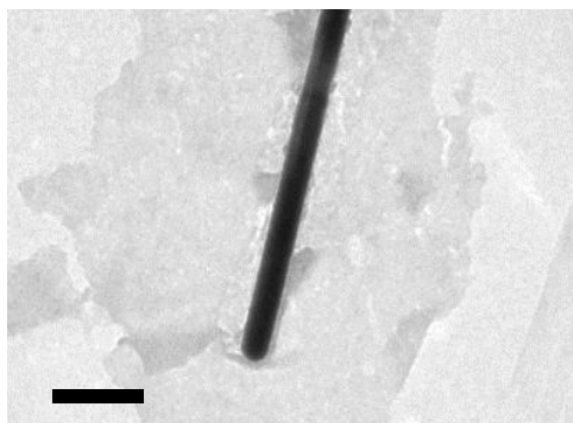

Figure S5. TEM image of a GNW mixed with titanium precursor. The titanium-compound GNW conjugate could not be obtained.

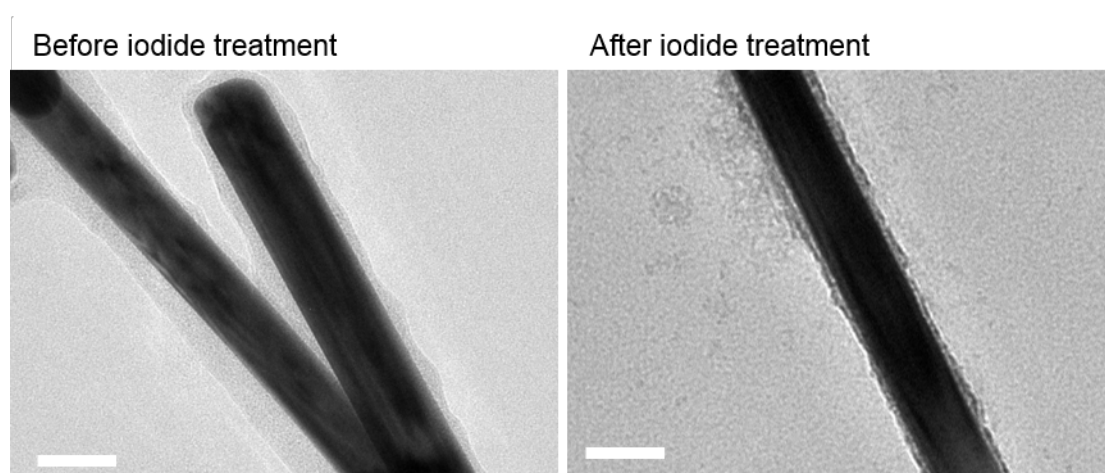

Figure S6. Stability of a  $\text{TiO}_2$  coated Au-nanomaterial in iodide solution.  $\text{TiO}_2$  coated gold nanowires were incubated in iodide solution (10% Iodolyte AN-50. The AN-50 containing 10-25% 1,2-dimethyl-3-propylimidazolium iodide, 2.5-10% iodine in acetonitrile, was purchased from Solaronix SA, Switzerland) for 0.5 hours. The samples were analyzed without stain. No change of Au-NPs sizes confirmed before and after incubation in iodide solution. The scale bars are 50 nm.

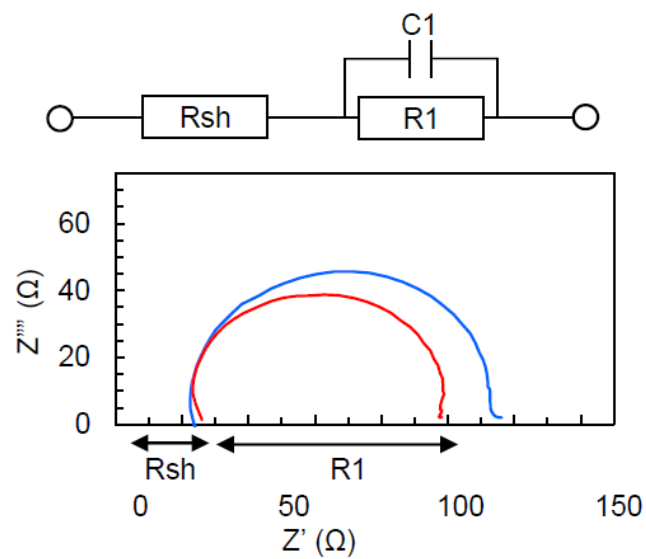

Figure S7. Electrochemical impedance spectra (EIS) of PSCs with the nanowire. A solid red line indicates EIS of cells based on  $\text{TiO}_2$  electrode with 0.3 wt%  $\text{TiO}_2$  -coated GNW. The blue line indicates EIS of the conventional cells with 150 nm thickness  $\text{TiO}_2$  electrode.
